# Supplementary material for: Heme oxygenase-1 inhibition mediates Gas6 to enhance bortezomib-sensitivity in multiple myeloma via ERK/STAT3 axis
Source: publisher site journal article supplement (doi:10.18632/aging.102996), 2020-04-16
Supplement: Supplementary file [file aging-v12i8-102996-supplementary-material-SD2.pdf]

## SUPPLEMENTARY TABLE

Supplementary Table 1. The characteristics of patients with multiple myeloma.

| Patient | Age (years) | Sex    | Serum $\beta$<br>2M(mg/L) | Serum<br>Albumin (g/L) | ISS<br>stage |
|---------|-------------|--------|---------------------------|------------------------|--------------|
| 1       | 54          | Female | 1.98                      | 44.4                   | I            |
| 2       | 50          | Female | 2.96                      | 46.7                   | I            |
| 3       | 80          | Female | 2.97                      | 42                     | I            |
| 4       | 50          | Male   | 1.57                      | 36.9                   | I            |
| 5       | 59          | Male   | 3.02                      | 37.9                   | I            |
| 6       | 68          | Female | 3.14                      | 29.7                   | II           |
| 7       | 71          | Female | 4.07                      | 38.7                   | II           |
| 8       | 43          | Male   | 1.93                      | 39.3                   | II           |
| 9       | 60          | Male   | 6.5                       | 32.7                   | II           |
| 10      | 88          | Male   | 4.37                      | 35.2                   | II           |
| 11      | 68          | Male   | 3.7                       | 42                     | II           |
| 12      | 47          | Male   | 3.84                      | 39.6                   | II           |
| 13      | 74          | Female | 3.8                       | 36                     | II           |
| 14      | 47          | Male   | 3.44                      | 29.5                   | II           |
| 15      | 63          | Male   | 4.95                      | 32.4                   | II           |
| 16      | 64          | Male   | 8.43                      | 31.9                   | III          |
| 17      | 59          | Male   | 7.93                      | 30.5                   | III          |
| 18      | 51          | Female | 15.34                     | 37.6                   | III          |
| 19      | 61          | Male   | 11.67                     | 20.7                   | III          |
| 20      | 65          | Female | 14.86                     | 33.5                   | III          |
| 21      | 55          | Male   | 6.97                      | 39.6                   | III          |
| 22      | 66          | Male   | 12.93                     | 34.3                   | III          |
| 23      | 63          | Male   | 11.34                     | 31.8                   | III          |
| 24      | 53          | Male   | 12.09                     | 37.6                   | III          |
| 25      | 53          | Female | 11.87                     | 40.2                   | III          |
| 26      | 67          | Female | 8.66                      | 41.8                   | III          |
| 27      | 60          | Male   | 9.74                      | 25.5                   | III          |
| 28      | 51          | Female | 8.32                      | 36.8                   | III          |
| 29      | 70          | Male   | 9.01                      | 35.2                   | III          |
| 30      | 61          | Female | 15.46                     | 29.6                   | III          |

All patients were newly diagnosed with multiple myeloma and had not received hematology-related treatment.
